# Supplementary material for: Silk-based organic photoresists for extreme ultraviolet lithography: a multiscale in silico study
Source: Royal Society of Chemistry journal article supplement (doi:10.1039/d2tc04053k), 2023-01-01
Supplement: d2tc04053k1.pdf [file d2tc04053k1.pdf]

Supporting information for

# Silk-based Organic Photoresist for Extreme Ultraviolet Lithography: A Multiscale in Silico Study

*Taeyoung Yoon<sup>1</sup>, Wooboum Park<sup>1</sup>, Yoonjung Kim<sup>1</sup>, Hyunsung Choi<sup>2</sup>, Soonchun Chung<sup>3</sup>, Joonsong Park<sup>3\*</sup>, Hyun  
Joon Chang<sup>4\*</sup> and Sungsoo Na<sup>1\*</sup>*

\*Correspondence should be addressed to Sungsoo Na. (e-mail: [nass@korea.ac.kr](mailto:nass@korea.ac.kr))

<sup>1</sup>Department of Mechanical Engineering, Korea University, 02841, Seoul, Republic of Korea

<sup>2</sup>Institute of Industrial Technology, Korea University, 30019, Sejong, Korea

<sup>3</sup>Material Research Center, Samsung Advanced Institute of Technology, Samsung Electronics Co., LTD.,  
Yeongtong-Gu, Suwon, 16678, Republic of Korea

<sup>4</sup>HITS Inc., 124, Teheran-ro, Gangnam-gu, Seoul, 06234, Republic of Korea

**Contents:**

**1. Supplementary Figures**

**2. Supplementary Tables**

## 1. Supplementary Figures

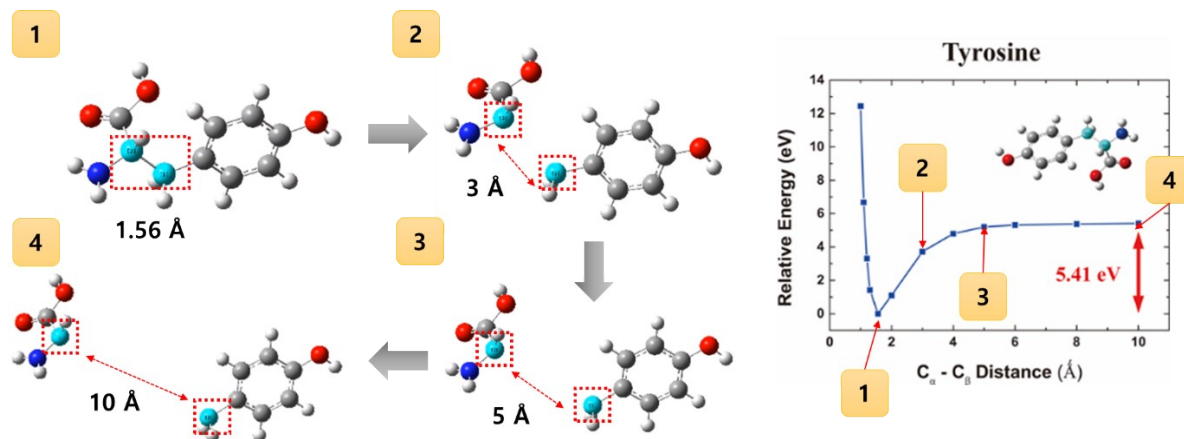

**Figure S1.** Representation of the dissociation process and dissociation curve.

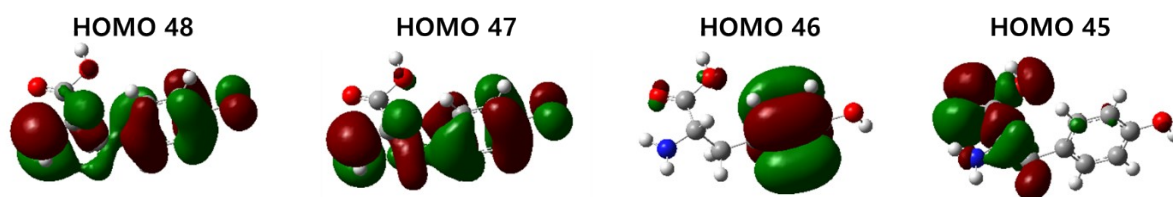

**Figure S2.** Representation of molecular orbital of HOMO and LUMO states.

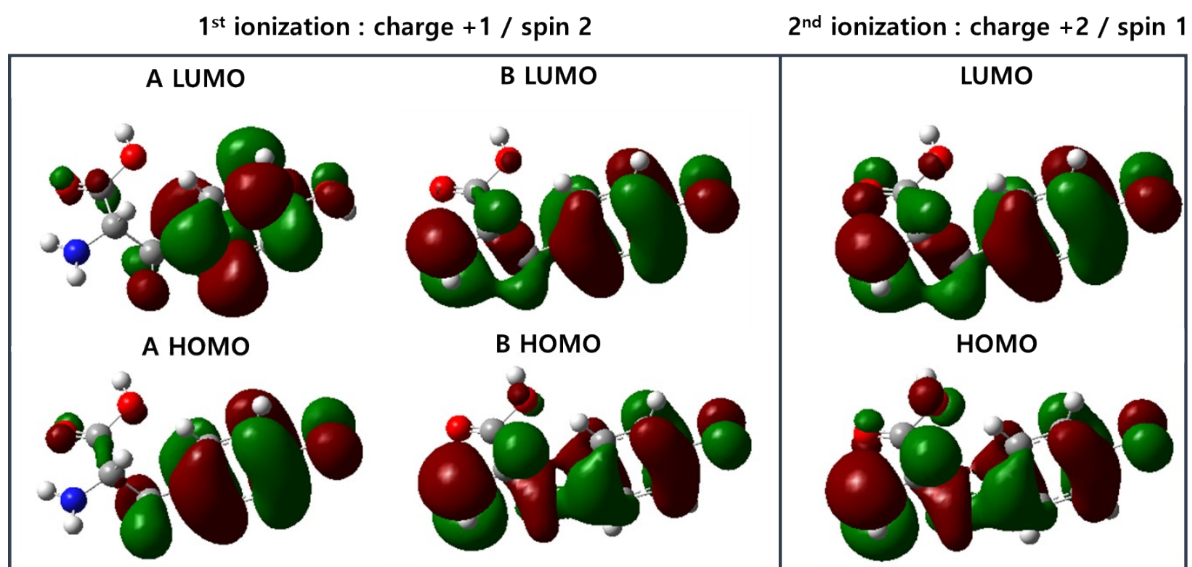

**Figure S3.** Representation of molecular orbital of HOMO and LUMO states at first and secondary ionization.

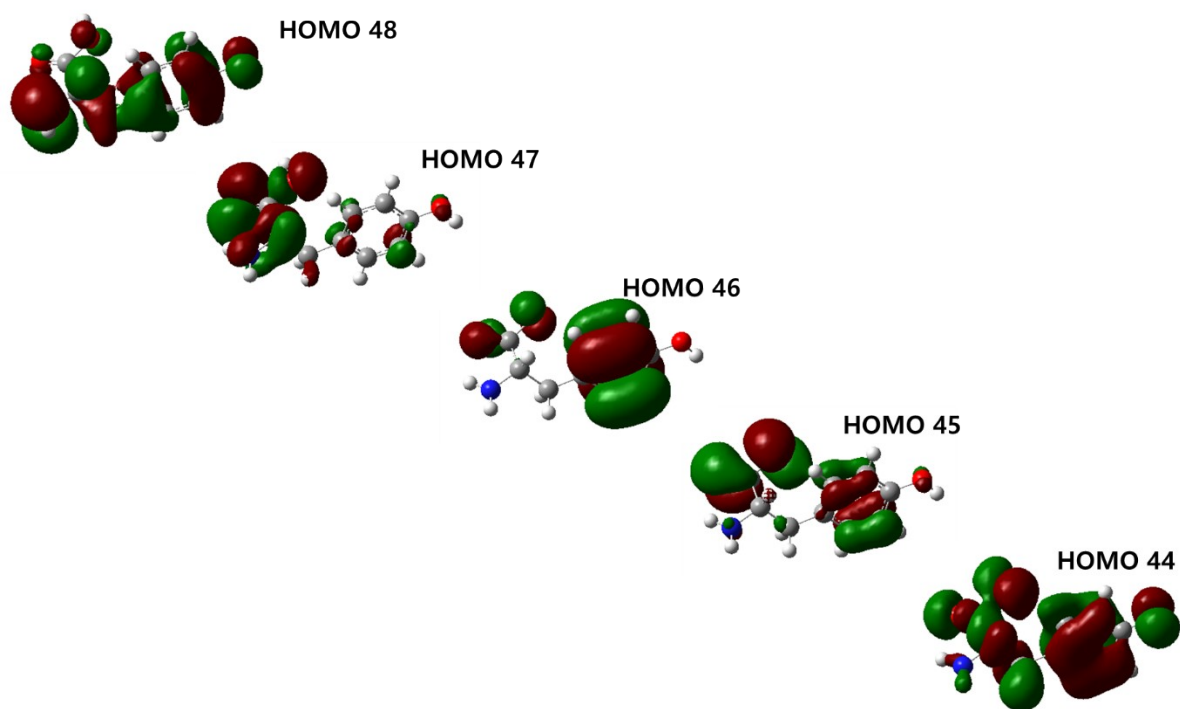

**Figure S4.** Representation of molecular orbital of secondary electron ionization. HOMO 44 to 48 are represented.

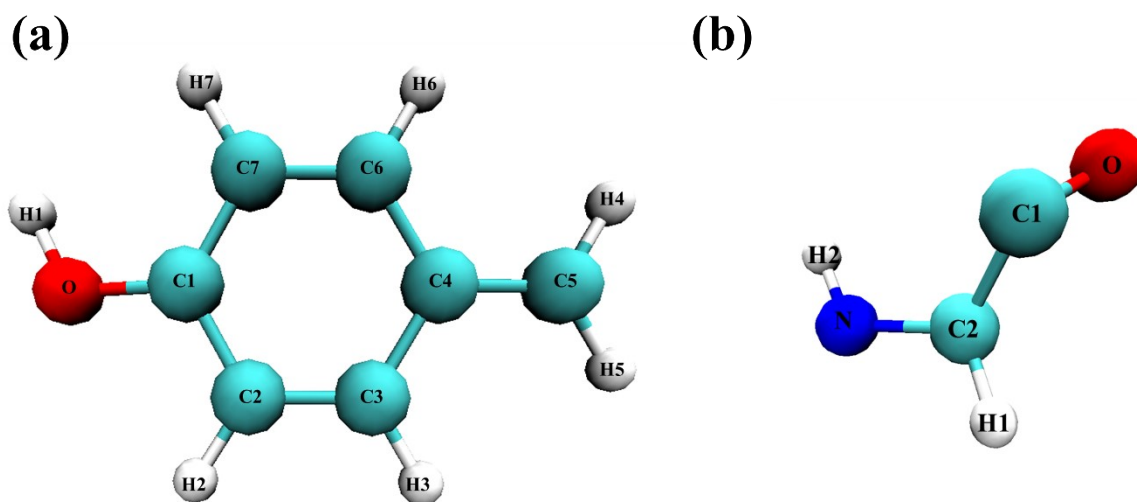

**Figure S5.** Atom index of dissociated tyrosine. (a) Quinone methide. (b) Glycine

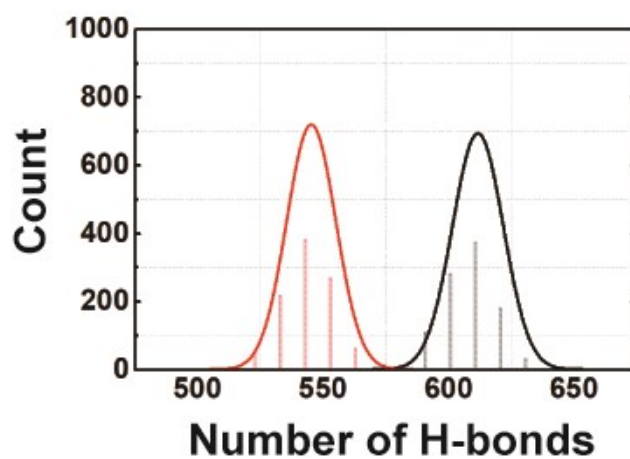

**Figure S6.** Comparison of the number of the hydrogen bonds before (black line and region) and after (red line and region) photoreaction

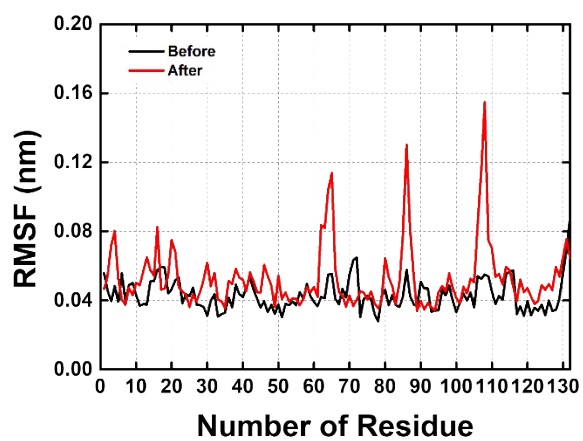

**Figure S7.** Silk peptide root mean square fluctuation (RMSF) before (black line) and after (red line) photoreaction.

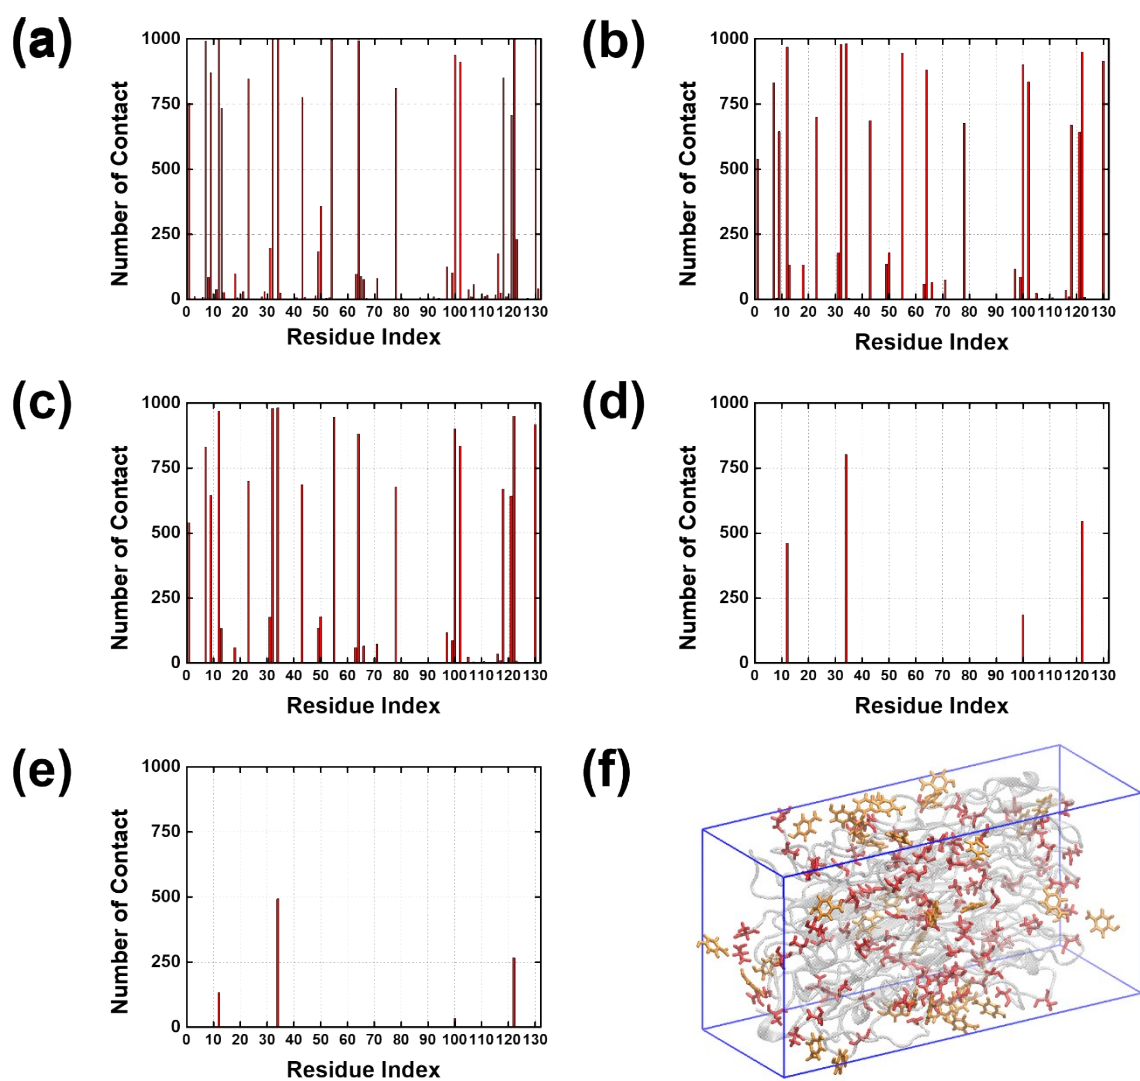

**Figure S8.** Number of contact atoms of silk peptide residue and quinone methide (QMC) through MD trajectories as a function of the cut-off distance. (a) 2.0 nm, (b) 1.8 nm, (c) 1.6 nm, (d) 1.4 nm, and (e) 1.2 nm cut-off distance. (f) Molecular representation of the binding of silk and quinone methide. Photoionized tyrosine is in red and quinone methides are in yellow.



## 2. Supplementary Tables

**Table S1. Molecular parameters of dissociated tyrosine (glycine part)**

| <b>Atom index</b> | <b>Atom name</b> | <b>Partial charge</b> |
|-------------------|------------------|-----------------------|
| 1                 | N                | -0.233                |
| 2                 | H1               | 0.196                 |
| 3                 | C1               | 0.078                 |
| 4                 | H2               | 0.401                 |
| 5                 | C2               | 0.596                 |
| 6                 | O                | -0.038                |

**Table S2. Molecular parameters of dissociated tyrosine (quinone methide part)**

| <b>Atom index</b> | <b>Atom name</b> | <b>Partial charge</b> |
|-------------------|------------------|-----------------------|
| 1                 | H1               | 0.484                 |
| 2                 | O                | -0.501                |
| 3                 | C1               | 0.572                 |
| 4                 | C2               | -0.289                |
| 5                 | H                | 0.203                 |
| 6                 | C3               | -0.041                |
| 7                 | H                | 0.174                 |
| 8                 | C4               | 0.131                 |
| 9                 | C5               | -0.154                |
| 10                | H2               | 0.187                 |
| 11                | H3               | 0.187                 |
| 12                | C6               | -0.041                |
| 13                | H4               | 0.174                 |
| 14                | C7               | -0.289                |
| 15                | H5               | 0.203                 |
